# Supplementary material for: FRET-Mediated Long-Range Wavelength Transformation by Photoconvertible Fluorescent Proteins as an Efficient Mechanism to Generate Orange-Red Light in Symbiotic Deep Water Corals
Source: MDPI journal article supplement (doi:10.3390/ijms18071174), 2017-07-04
Supplement: s1 [file s1]

## SUPPLEMENTARY INFORMATION

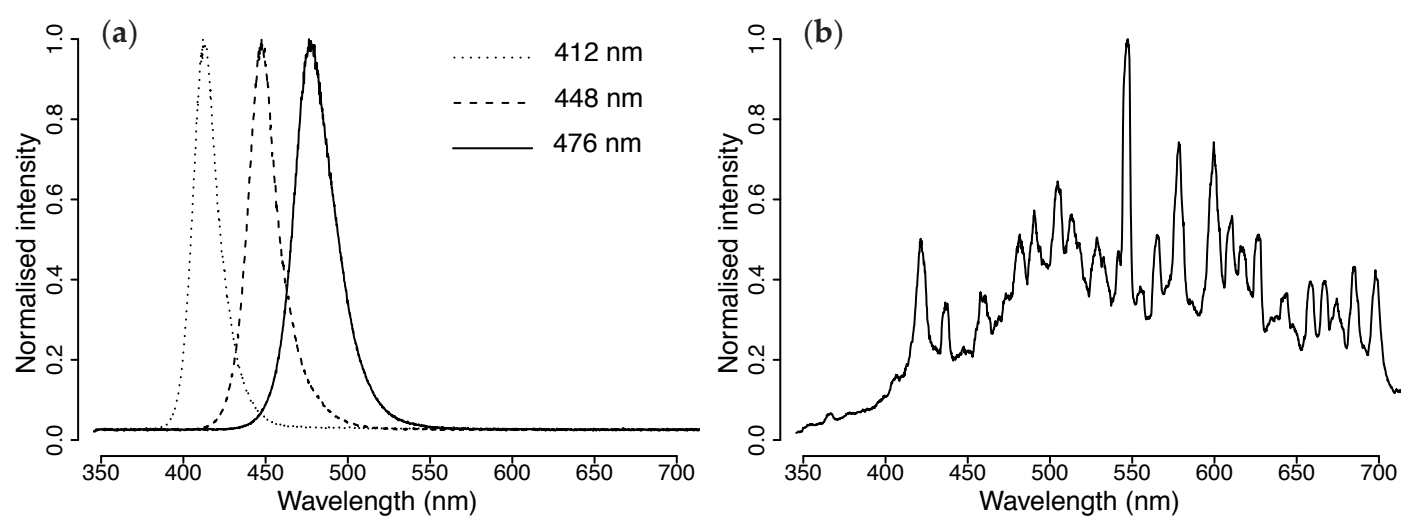

**Figure S1.** Spectra of light sources used for all experiments. **(a)** Spectra of 412 nm (Aquaray NUV), 448 nm (Aquaray Fiji Blue) and 476 nm LED (Aquaray Reef Blue). **(b)** Spectrum of 400 W metal halide lamp.

**Table S1.** (a) Measured field photon flux, calculated 412 nm photon flux and linear regression results for each depth; (b) details of regression analysis for slopes as a function of depth.

(a)

| Depth (m) | Tot. ph.f. <sup>1</sup> | 412 nm ph.f. <sup>2</sup> | McavRFP |                    |        | EosFP |                    |        | EechRFP |                    |        |
|-----------|-------------------------|---------------------------|---------|--------------------|--------|-------|--------------------|--------|---------|--------------------|--------|
|           |                         |                           | Slope   | R <sup>2</sup> adj | p      | Slope | R <sup>2</sup> adj | p      | Slope   | R <sup>2</sup> adj | p      |
| 10        | 525                     | 30.70                     | 4.19    | 0.99               | <0.001 | 3.01  | 1.00               | <0.001 | 5.31    | 0.99               | <0.001 |
| 20        | 219                     | 14.60                     | 2.72    | 0.99               | <0.001 | 1.47  | 1.00               | <0.001 | 3.16    | 1.00               | <0.001 |
| 30        | 108                     | 7.30                      | 1.32    | 1.00               | <0.001 | 0.72  | 0.99               | <0.001 | 1.78    | 0.99               | <0.001 |
| 40        | 74.4                    | 5.29                      | 0.89    | 1.00               | <0.001 | 0.45  | 0.98               | <0.001 | 1.13    | 0.99               | <0.001 |
| 50        | 39.5                    | 2.65                      | 0.46    | 0.99               | <0.001 | 0.17  | 0.99               | <0.001 | 0.49    | 1.00               | <0.001 |
| 60        | 20.4                    | 1.30                      | 0.22    | 0.96               | <0.001 | 0.13  | 0.99               | <0.001 | 0.37    | 1.00               | <0.001 |
| 80        | 7.15                    | 0.44                      | 0.10    | 0.94               | <0.001 | 0.04  | 0.81               | <0.001 | 0.17    | 0.99               | <0.001 |

1. Tot. ph.f = total photon flux ( $\mu\text{mol photons m}^{-2}\text{s}^{-1}$ )

2. 412 nm ph.f = 412 nm photon flux ( $\mu\text{mol photons m}^{-2}\text{s}^{-1}$ )

(b)

|                | Model                                 | R <sup>2</sup> adj | p      |
|----------------|---------------------------------------|--------------------|--------|
| <b>McavRFP</b> | $e^{2.02 - 0.06 \times \text{depth}}$ | 0.99               | <0.001 |
| <b>EosFP</b>   | $e^{1.59 - 0.06 \times \text{depth}}$ | 0.99               | <0.001 |
| <b>EechRFP</b> | $e^{2.11 - 0.05 \times \text{depth}}$ | 0.99               | <0.001 |

**Table S2.** Model equations and statistical test results for non-linear least squares analysis of normalised green and red fluorescence of *M. cavernosa* during photoconversion (Figure 5a).

|                       | Model                           | k Estimate | SE    | t-value | p      |
|-----------------------|---------------------------------|------------|-------|---------|--------|
| <b>Green Emission</b> | $1/(k \cdot x + 1)$             | 0.025      | 0.003 | 9.163   | <0.001 |
| <b>Red Emission</b>   | $y_0 + 1 - (1/(k \cdot x + 1))$ | 0.026      | 0.002 | 13.06   | <0.001 |

**Table S3.** Absorbance maxima (Abs) after spectral decomposition of purified FPs used in Figure 6, and calculated concentration (Conc.) values.

| Protein      | Green Chromophore |                                     | Red Chromophore |                                     |       |
|--------------|-------------------|-------------------------------------|-----------------|-------------------------------------|-------|
|              | Abs               | Conc. $\mu\text{g}\mu\text{L}^{-1}$ | Abs             | Conc. $\mu\text{g}\mu\text{L}^{-1}$ |       |
| EosFP Stage1 | 0.108             | 0.039                               | -               | -                                   | 0.039 |
| EosFP Stage2 | 0.11              | 0.039                               | 0.021           | 0.013                               | 0.052 |
| EosFP Stage3 | 0.1               | 0.036                               | 0.05            | 0.031                               | 0.067 |
| EosFP Stage4 | 0.067             | 0.024                               | 0.149           | 0.094                               | 0.118 |
| eqFP611      | -                 | -                                   | 0.472           | 0.158                               | 0.158 |
